# Supplementary material for: The H19-PEG10/IGF2BP3 axis promotes gastric cancer progression in patients with high lymph node ratios
Source: PubMed Central journal article supplement (PMC5650363; doi:10.18632/oncotarget.20209), 2017-08-05
Supplement: oncotarget-08-74567-s001.pdf [file oncotarget-08-74567-s001.pdf]

## **The *H19-PEG10/IGF2BP3* axis promotes gastric cancer progression in patients with high lymph node ratios**

### **SUPPLEMENTARY MATERIALS**

**Supplementary Table 1: Clinicopathological characteristics and recurrence-free survival or lymph node ratio in pStage IIIc gastric cancer patients from 2000 to 2010**

See Supplementary File 1

**Supplementary Table 2: Clinicopathological characteristics and recurrence-free survival or lymph node ratio in pStage IIIc gastric cancer patients from 2011 to 2015**

See Supplementary File 2

**Supplementary Table 3: Clinicopathological characteristics and recurrence-free survival in 39 patients with stage III gastric cancer**

See Supplementary File 3

Supplementary Table 4: PCR sequences of primers and fluorescent probe used in this study

| Methods        | Gene              | Forward primer sequence (5' to 3') | fluorescent probe (5' to 3') | Reverse primer sequence (5' to 3') |
|----------------|-------------------|------------------------------------|------------------------------|------------------------------------|
| RT-PCR/qRT-PCR | H19               | aaagacaccatcggaacagc               | acatcatcccagagctgagc         | agagtcgtggaggctttgaa               |
| RT-PCR/qRT-PCR | PEG10             | tgcttctggcaacttcattg               | accagctttcatgatggaa          | tcaaatgacagcacctctcg               |
| RT-PCR         | IGF2BP3           | cagttcaaggctcagggaaag              |                              | ggtcacgagggacaacaact               |
| RT-PCR         | PGA3              | ttaccgtcgagggttactgg               |                              | tccattgatggtgaagacga               |
| RT-PCR         | CD177             | ggcctggagtctctcacttg               |                              | ccccagtgtgctgtaggt                 |
| RT-PCR         | CDH1 (E-cadherin) | tcatgagtgtcccccggtat               |                              | tcttgaagcgattgccccat               |
| RT-PCR         | EGFR              | cgctaccttgctattca                  |                              | tgcactcagagagctcagga               |
| RT-PCR         | Zeb1              | aacagttggtttggtgt                  |                              | cttcaccatacaacaaggt                |
| RT-PCR         | Snail1            | gttfacctccagcagccct                |                              | gagcctttcccactgtctc                |
| RT-PCR/qRT-PCR | $\beta$ -actin    | tcaccacactgtgccctctacga            | ggacttcgagcaagagatgg         | cagcgggaaccgctcattgccaatgg         |

\*1 : RT-PCR was done at 95°C for 3 min followed by 27 cycles at 95°C for 1 min, 60°C for 1 min, 72°C for 1 min, and final extension at 72°C for 10 min 1 $\mu$ l dNTP mixture, 1.5 $\mu$ l MgCl<sub>2</sub>, 0.2 $\mu$ mol/l each primer and 0.2 $\mu$ l Platinum Taq DNA polymerase.

\*2 : qRT-PCR was done at 95°C for 3 min followed by 40 cycles at 95°C for 20 sec, 60°C for 30 sec, and 72°C for 30 sec, in a 25 $\mu$ l reaction volume containing 200nmol/l fluorescein probe and 12.5 $\mu$ l iQ<sup>TM</sup> supermix (Bio-Rad, Hercules, CA) in triplicate on the iCycler iQ<sup>TM</sup> Real-Time PCR Detection system (Bio-Rad, Hercules, CA).
